# Supplementary material for: Occupancy and detectability modelling of vertebrates in northern Australia using multiple sampling methods
Source: PLOS journal article supplement (doi:10.1371/journal.pone.0203304), 2018-09-24
Supplement: S16 (10.1371/journal.pone.0203304.s016) [file journal.pone.0203304.s016]

| Species                   | Intercept | Terrain ruggedness | Fire Frequency | Time since fire | Sampling Method | Model number | Comment              | Occupied Sites |
|---------------------------|-----------|--------------------|----------------|-----------------|-----------------|--------------|----------------------|----------------|
| Apostlebird               |           |                    |                |                 |                 |              | Could not fit models | 1              |
| Arafura Fantail           | -0.13     |                    |                |                 |                 | 0            | Null model           | 4              |
| Australasian Darter       |           |                    |                |                 |                 |              | Could not fit models | 1              |
| Australasian Figbird      |           |                    |                |                 |                 |              | Could not fit models | 1              |
| Australian Bustard        |           |                    |                |                 |                 |              | Could not fit models | 1              |
| Australian Hobby          |           |                    |                |                 |                 |              | No suitable models   | 2              |
| Australian Owlet-nightjar | -2.56     |                    |                |                 | +               | 4            |                      | 20             |
| Australian Pelican        |           |                    |                |                 |                 |              | Could not fit models | 1              |
| Australian White Ibis     |           |                    |                |                 |                 |              | Failed GOF tests     | 2              |
| Azure Kingfisher          |           |                    |                |                 |                 |              | Could not fit models | 3              |
| Banded Fruit-dove         | -1.8      |                    |                |                 |                 | 10           |                      | 11             |
| Banded Honeyeater         | -0.47     |                    |                |                 |                 | 2            |                      | 13             |
| Bar-breasted Honeyeater   |           |                    |                |                 |                 |              | No suitable models   | 2              |
| Barking Owl               | -3.56     |                    |                |                 |                 | 2            |                      | 6              |
| Bar-shouldered Dove       | 0.15      |                    |                |                 |                 | 1            |                      | 100            |
| Black Bittern             |           |                    |                |                 |                 |              | Could not fit models | 1              |
| Black Kite                |           |                    |                |                 |                 |              | Could not fit models | 3              |
| Black-breasted Buzzard    |           |                    |                |                 |                 |              | Could not fit models | 1              |
| Black-chinned Honeyeater  |           |                    |                |                 |                 |              | Could not fit models | 1              |
| Black-faced Cuckoo-shrike | -0.76     |                    |                |                 |                 | 1            |                      | 28             |
| Black-faced Woodswallow   |           |                    |                |                 |                 |              | Failed GOF tests     | 10             |
| Black-shouldered Kite     | -0.11     |                    |                |                 |                 | 2            |                      | 4              |
| Black-tailed Treecreeper  | 0.04      |                    |                |                 |                 | 1            |                      | 11             |
| Blue-faced Honeyeater     | -1.12     |                    |                |                 |                 | 6            |                      | 35             |
| Blue-winged Kookaburra    | -1.16     |                    |                |                 |                 | 1            |                      | 45             |
| Broad-billed Flycatcher   |           |                    |                |                 |                 |              | No suitable models   | 2              |
| Brown Falcon              | -2.11     |                    |                |                 |                 | 3            |                      | 14             |
| Brown Goshawk             | -2.74     |                    |                |                 |                 | 7            |                      | 20             |
| Brown Honeyeater          | 0.44      |                    | 0.26           |                 |                 | 2            |                      | 81             |
| Brown Quail               | -1.57     |                    |                |                 |                 | 4            |                      | 14             |
| Brush Cuckoo              |           |                    |                |                 |                 |              | Could not fit models | 19             |
| Bush Stone-curlew         |           |                    |                |                 |                 |              | Could not fit models | 6              |

| Species                      | Intercept | Terrain ruggedness | Fire frequency | Time since fire | Sampling Method | Model number | Comment              | Occupied Sites |
|------------------------------|-----------|--------------------|----------------|-----------------|-----------------|--------------|----------------------|----------------|
| Cattle Egret                 |           |                    |                |                 |                 |              | Could not fit models | 1              |
| Channel-billed Cuckoo        |           |                    |                |                 |                 |              | No suitable models   | 3              |
| Chestnut-backed Button-quail | -1.69     |                    |                |                 |                 | 4            |                      | 6              |
| Chestnut-breasted Mannikin   |           |                    |                |                 |                 |              | Could not fit models | 1              |
| Chestnut-quilled Rock-Pigeon | -0.41     |                    |                |                 |                 | 11           |                      | 20             |
| Cicadabird                   | -2.21     |                    |                |                 |                 | 7            |                      | 9              |
| Collared Sparrowhawk         | -4.29     |                    |                |                 |                 | 9            |                      | 3              |
| Common Bronzewing            | -1.23     |                    |                |                 |                 | 1            |                      | 6              |
| Crimson Finch                | -0.63     |                    |                |                 |                 | 1            |                      | 13             |
| Diamond Dove                 | -1.62     |                    |                |                 |                 | 4            |                      | 18             |
| Dollarbird                   | -0.79     |                    |                |                 |                 | 1            |                      | 6              |
| Double-barred Finch          | -1.62     |                    |                |                 |                 | 5            |                      | 6              |
| Dusky Grasswren              |           |                    |                |                 |                 |              | Could not fit models | 1              |
| Dusky Honeyeater             |           |                    |                |                 |                 |              | No suitable models   | 62             |
| Eastern Great Egret          |           |                    |                |                 |                 |              | Could not fit models | 2              |
| Eastern Koel                 |           |                    |                |                 |                 |              | Could not fit models | 1              |
| Emerald Dove                 |           |                    |                |                 |                 |              | Could not fit models | 2              |
| Forest Kingfisher            | -0.24     |                    |                |                 |                 | 1            |                      | 26             |
| Fork-tailed Swift            |           |                    |                |                 |                 |              | Could not fit models | 1              |
| Galah                        | -1.4      |                    |                |                 |                 | 1            |                      | 13             |
| Golden-headed Cisticola      | -0.21     |                    |                |                 |                 | 5            |                      | 11             |
| Great Bowerbird              |           |                    |                |                 |                 |              | No suitable models   | 47             |
| Green-backed Gerygone        |           |                    |                |                 |                 |              | No suitable models   | 10             |
| Grey Butcherbird             | 0.11      |                    |                |                 |                 | 1            |                      | 10             |
| Grey Shrike-thrush           | -0.85     |                    |                |                 |                 | 4            |                      | 16             |
| Grey Whistler                |           |                    |                |                 |                 |              | Could not fit models | 1              |
| Grey-crowned Babbler         | -1.31     |                    |                |                 |                 | 5            |                      | 19             |
| Grey-fronted Honeyeater      |           |                    |                |                 |                 |              | No suitable models   | 3              |
| Helmeted Friarbird           | 0.71      | 0.58               |                |                 |                 | 2            |                      | 37             |
| Hooded Parrot                |           |                    |                |                 |                 |              | No suitable models   | 2              |
| Hooded Robin                 |           |                    |                |                 |                 |              | Could not fit models | 1              |
| Horsfield's Bronze-Cuckoo    |           |                    |                |                 |                 |              | Could not fit models | 1              |
| Jacky Winter                 |           |                    |                |                 |                 |              | Could not fit models | 5              |
| Large-tailed Nightjar        |           |                    |                |                 |                 |              | Could not fit models | 1              |

| Species                 | Intercept | Terrain ruggedness | Fire frequency | Time since fire | Sampling Method | Model number | Comment              | Occupied Sites |
|-------------------------|-----------|--------------------|----------------|-----------------|-----------------|--------------|----------------------|----------------|
| Little Bronze-Cuckoo    | -1.38     |                    |                |                 |                 | 2            |                      | 8              |
| Little Button-quail     |           |                    |                |                 |                 |              | Could not fit models | 1              |
| Little Corella          | -0.74     |                    |                |                 |                 | 3            |                      | 5              |
| Little Eagle            |           |                    |                |                 |                 |              | Could not fit models | 1              |
| Little Friarbird        | -0.96     |                    |                | -0.49           |                 | 3            |                      | 48             |
| Little Pied Cormorant   |           |                    |                |                 |                 |              | Could not fit models | 2              |
| Little Shrike-thrush    |           |                    |                |                 |                 |              | Could not fit models | 5              |
| Little Woodswallow      | -1.38     |                    |                |                 |                 | 4            |                      | 24             |
| Long-tailed Finch       | -2.32     |                    |                |                 |                 | 3            |                      | 12             |
| Magpie-lark             | -0.18     |                    |                |                 |                 | 6            |                      | 17             |
| Masked Finch            | -2.34     |                    |                |                 |                 | 3            |                      | 5              |
| Masked Owl              |           |                    |                |                 |                 |              | Failed GOF tests     | 3              |
| Masked Woodswallow      | -3.84     |                    |                |                 |                 | 4            |                      | 4              |
| Mistletoebird           | 0.06      |                    |                | 0.25            |                 | 1            |                      | 131            |
| Nankeen Night Heron     |           |                    |                |                 |                 |              | Could not fit models | 2              |
| Northern Fantail        | -0.34     |                    |                |                 |                 | 1            |                      | 59             |
| Northern Rosella        | -0.86     |                    |                |                 |                 | 6            |                      | 27             |
| Olive-backed Oriole     | -1.88     |                    |                |                 |                 | 4            |                      | 13             |
| Orange-footed Scrubfowl |           |                    |                |                 |                 |              | No suitable models   | 7              |
| Oriental Cuckoo         |           |                    |                |                 |                 |              | Could not fit models | 1              |
| Pallid Cuckoo           |           |                    |                |                 |                 |              | Could not fit models | 1              |
| Partridge Pigeon        | -0.89     |                    |                |                 |                 | 3            |                      | 6              |
| Peaceful Dove           | 0.06      |                    | 0.4            |                 |                 | 1            |                      | 140            |
| Pheasant Coucal         | -2.51     |                    |                |                 |                 | 4            |                      | 13             |
| Pied Butcherbird        | -0.24     |                    |                |                 |                 | 1            |                      | 55             |
| Pied Imperial-Pigeon    | 0.2       |                    |                |                 |                 | 1            |                      | 5              |
| Radjah Shelduck         |           |                    |                |                 |                 |              | Could not fit models | 1              |
| Rainbow Bee-eater       | -0.34     |                    |                |                 |                 | 1            |                      | 100            |
| Rainbow Lorikeet        | -0.21     |                    | -0.37          | -0.7            |                 | 1            |                      | 92             |
| Rainbow Pitta           |           |                    |                |                 |                 |              | No suitable models   | 5              |
| Red Goshawk             |           |                    |                |                 |                 |              | Could not fit models | 3              |
| Red-backed Fairy-wren   | -0.48     |                    |                |                 |                 | 1            |                      | 24             |
| Red-backed Kingfisher   | -2.07     |                    |                |                 |                 | 12           |                      | 5              |
| Red-browed Pardalote    |           |                    |                |                 |                 |              | Could not fit models | 6              |

| Species                     | Intercept | Terrain ruggedness | Fire frequency | Time since fire | Sampling Method | Model number | Comment              | Occupied Sites |
|-----------------------------|-----------|--------------------|----------------|-----------------|-----------------|--------------|----------------------|----------------|
| Red-tailed Black Cockatoo   |           |                    |                |                 |                 |              | Could not fit models | 4              |
| Red-winged Parrot           |           |                    |                |                 |                 |              | Could not fit models | 73             |
| Restless Flycatcher         | -0.73     |                    |                |                 |                 | 2            |                      | 14             |
| Rose-crowned Fruit-dove     |           |                    |                |                 |                 |              | Could not fit models | 2              |
| Rufous Owl                  |           |                    |                |                 |                 |              | Could not fit models | 1              |
| Rufous Songlark             | -0.23     |                    |                |                 |                 | 3            |                      | 4              |
| Rufous Whistler             | -0.15     |                    |                |                 |                 | 1            |                      | 61             |
| Rufous-banded Honeyeater    | 1.04      |                    |                |                 |                 | 5            |                      | 8              |
| Rufous-throated Honeyeater  | -1.13     |                    |                |                 |                 | 0            | Null model           | 6              |
| Sacred Kingfisher           | -1.13     |                    |                |                 |                 | 3            |                      | 10             |
| Sandstone Shrike-thrush     | 0.07      |                    |                |                 |                 | 9            |                      | 18             |
| Shining Flycatcher          | 0.15      |                    |                |                 |                 | 2            |                      | 7              |
| Silver-crowned Friarbird    | 0.13      |                    |                |                 |                 | 1            |                      | 107            |
| Southern Boobook            | -1.85     |                    |                |                 |                 | 9            |                      | 33             |
| Spangled Drongo             | -0.82     |                    |                |                 |                 | 3            |                      | 41             |
| Spinifex Pigeon             |           |                    |                |                 |                 |              | Could not fit models | 1              |
| Spotted Harrier             |           |                    |                |                 |                 |              | Could not fit models | 1              |
| Spotted Nightjar            | -0.23     |                    |                |                 |                 | 1            |                      | 7              |
| Straw-necked ibis           | -0.93     |                    |                |                 |                 | 7            |                      | 6              |
| Striated Pardalote          | 0.22      |                    |                |                 |                 | 1            |                      | 95             |
| Sulphur-crested Cockatoo    | -1.27     |                    | -0.38          |                 |                 | 13           |                      | 54             |
| Tawny Frogmouth             | -2.36     |                    |                |                 | +               | 5            |                      | 27             |
| Torresian Crow              | 0.82      |                    | -1.29          | -0.65           |                 | 1            |                      | 64             |
| Tree Martin                 |           |                    |                |                 |                 |              | Could not fit models | 1              |
| Varied Lorikeet             | -0.94     |                    |                |                 |                 | 1            |                      | 15             |
| Varied Sittella             |           |                    |                |                 |                 | 0            | Null model           | 4              |
| Varied Triller              |           |                    |                |                 |                 |              | Failed GOF tests     | 19             |
| Variegated Fairy-wren       | 0.13      |                    |                |                 |                 | 1            |                      | 11             |
| Wedge-tailed Eagle          |           |                    |                |                 |                 |              | Could not fit models | 2              |
| Weebill                     | 0.21      |                    |                |                 |                 | 1            |                      | 96             |
| Whistling Kite              | -0.65     |                    |                |                 |                 | 1            |                      | 37             |
| White-bellied Cuckoo-shrike | -0.57     | 0.29               |                |                 |                 | 1            |                      | 110            |
| White-bellied Sea-eagle     |           |                    |                |                 |                 |              | Could not fit models | 2              |
| White-breasted Woodswallow  | -1.41     |                    |                |                 |                 | 2            |                      | 3              |

| Species                    | Intercept | Terrain ruggedness | Fire frequency | Time since fire | Sampling Method | Model number | Comment              | Occupied Sites |
|----------------------------|-----------|--------------------|----------------|-----------------|-----------------|--------------|----------------------|----------------|
| White-breasted Woodswallow | -1.41     |                    |                |                 |                 | 2            |                      | 3              |
| White-faced Heron          |           |                    |                |                 |                 |              | Could not fit models | 1              |
| White-gaped Honeyeater     | 0.12      |                    | 0.47           |                 |                 | 4            |                      | 34             |
| White-lined honeyeater     | 0.72      |                    |                |                 |                 | 1            |                      | 32             |
| White-throated Gerygone    |           |                    |                |                 |                 |              | Failed GOF tests     | 3              |
| White-throated Grasswren   |           |                    |                |                 |                 |              | Could not fit models | 3              |
| White-throated Honeyeater  | 0.53      | -0.21              |                |                 |                 | 1            |                      | 113            |
| White-winged Triller       | -1.14     |                    |                |                 |                 | 2            |                      | 16             |
| Willie Wagtail             |           |                    |                |                 |                 |              | No suitable models   | 46             |
| Yellow Oriole              | -0.3      |                    |                |                 |                 | 6            |                      | 24             |
| Yellow-throated Miner      | -0.22     |                    |                |                 |                 | 4            |                      | 14             |
| Yellow-tinted Honeyeater   |           |                    |                |                 |                 |              | Could not fit models | 1              |
